# Supplementary material
Source: PubMed Central journal article supplement (PMC4485368)
Supplement: Supp_Table1.pdf [file Supp_Table1.pdf]

## Supplementary Data

SUPPLEMENTARY TABLE S1. STATISTICS FOR FIGURE 2C

|             | <i>Group</i>                 |                            |                                |
|-------------|------------------------------|----------------------------|--------------------------------|
|             | <i>CD34 vs.<br/>CD34/MSC</i> | <i>CD34 vs.<br/>CD34-E</i> | <i>CD34 vs.<br/>CD34-E/MSC</i> |
| <i>Week</i> | <i>P-value</i>               |                            |                                |
| 0.6         | n.s.                         | 0.016                      | 0.029                          |
| 1           | n.s.                         | 0.001                      | 0.002                          |
| 1.5         | n.s.                         | n.s.                       | 0.037                          |
| 2           | n.s.                         | n.s.                       | n.s.                           |
| 2.5         | n.s.                         | n.s.                       | n.s.                           |
| 3           | n.s.                         | n.s.                       | n.s.                           |
| 3.5         | n.s.                         | n.s.                       | n.s.                           |
| 4           | n.s.                         | n.s.                       | n.s.                           |
| 4.5         | n.s.                         | n.s.                       | n.s.                           |
| 6           | 0.008                        | n.s.                       | n.s.                           |

MSC, mesenchymal stem cells; n.s., not significant.
